# Supplementary material
Source: PubMed Central journal article supplement (PMC9578390)
Supplement: jb.00304-22-s0001.pdf [file jb.00304-22-s0001.pdf]

**Supplemental Material for:**

**Title:** GpsB promotes PASTA kinase signaling and cephalosporin resistance in *Enterococcus faecalis*

**Authors:** Nicole E. Minton, Dušanka Djorić, Jaime Little, Christopher J. Kristich

**Running title:** GpsB promotes signaling and cephalosporin resistance

**Affiliation:**

Department of Microbiology and Immunology

Center for Infectious Disease Research

Medical College of Wisconsin

8701 Watertown Plank Rd

Milwaukee, WI 53226

\*For correspondence: [ckristich@mcw.edu](mailto:ckristich@mcw.edu)

**Table S1. GpsB is specifically required for cephalosporin resistance.**

|                 | WT <sup>b</sup> MIC (μg/mL) <sup>a</sup> | Δ <i>gpsB</i> MIC (μg/mL) |
|-----------------|------------------------------------------|---------------------------|
| Ceftriaxone     | 64                                       | 2                         |
| Cefuroxime      | 32                                       | 2                         |
| Ampicillin      | 0.5                                      | 0.5                       |
| Meropenem       | 2                                        | 1                         |
| Vancomycin      | 1                                        | 0.5                       |
| Bacitracin      | 32                                       | 32                        |
| Trimethoprim    | 0.25                                     | 0.125                     |
| Gentamicin      | 16                                       | 16                        |
| Chloramphenicol | 4                                        | 4                         |
| Norfloxacin     | 2                                        | 2                         |

<sup>a</sup> Minimal inhibitory concentrations (MIC) for ceftriaxone. Data represent the median MIC from 3 independent biological replicates.

<sup>b</sup> Strains analyzed were WT, OG1; and Δ*gpsB*, JL635.

**Table S2. Complementation of the Δ*ireK* *gpsB* mutant strain.**

| Strain <sup>b</sup>                            | Ceftriaxone MIC (μg/mL) <sup>a</sup> |
|------------------------------------------------|--------------------------------------|
| WT/vector                                      | 64                                   |
| WT/p- <i>gpsB</i> -His                         | 1024                                 |
| Δ <i>ireK</i> /vector                          | 1                                    |
| Δ <i>ireK</i> /p- <i>gpsB</i> -His             | 1                                    |
| Δ <i>ireK</i> <i>gpsB</i> /vector              | 0.5                                  |
| Δ <i>ireK</i> <i>gpsB</i> /p- <i>gpsB</i> -His | 2                                    |

<sup>a</sup> Minimal inhibitory concentrations (MIC) for ceftriaxone. Data represent the median MIC at least 2 independent biological replicates.

<sup>b</sup> Strains analyzed were WT/vector, OG1/pJRG9; WT/p-*gpsB*-His, OG1/pNEM4; Δ*ireK*/vector, JL206/pJRG9; Δ*ireK*/p-*gpsB*-His, JL206/pNEM4; Δ*ireK* *gpsB*/vector, NM6/pJRG9; and Δ*ireK* *gpsB*/p-*gpsB*-His, NM6/pNEM4.

**Table S3. Strains and plasmids used in this study.**

| Strain or plasmid | Description of genotype | Source or reference |
|-------------------|-------------------------|---------------------|
| <b>STRAINS</b>    |                         |                     |
| <i>E. coli</i>    |                         |                     |

|                                            |                                                                                                      |                   |
|--------------------------------------------|------------------------------------------------------------------------------------------------------|-------------------|
| TOP10                                      | Routine cloning host                                                                                 | Lab stock         |
| DH5 $\alpha$                               | Routine cloning host                                                                                 | Lab stock         |
| BL21 (DE3)                                 | Protein overexpression host                                                                          | Lab stock         |
| Nico21 (DE3)                               | Protein overexpression host                                                                          | Lab stock         |
| <i>E. faecalis</i>                         |                                                                                                      |                   |
| OG1                                        | Wild-type, original unmarked isolate                                                                 | (1)               |
| OG1RF                                      | Spontaneous rifampicin- and fusidic acid-resistant derivative of OG1                                 | (2)               |
| JL635                                      | OG1 $\Delta$ <i>gpsB</i> ( $\Delta$ L4-N130)                                                         | This work         |
| JL206                                      | OG1 $\Delta$ <i>ireK</i>                                                                             | (3)               |
| BL102                                      | OG1 <i>ireK</i> K41R                                                                                 | (3)               |
| NM6                                        | OG1 $\Delta$ <i>ireK</i> <i>gpsB</i>                                                                 | This work         |
| JL650                                      | OG1 $\Delta$ <i>mltG</i> ( $\Delta$ Q6-D452)                                                         | This work         |
| CK125                                      | OG1RF $\Delta$ ( <i>ireP ireK</i> )                                                                  | (4)               |
| SB23                                       | OG1 $\Delta$ <i>croR</i>                                                                             | (5)               |
| <i>E. faecium</i>                          |                                                                                                      |                   |
| 1,141,733                                  | Wild-type reference strain, clinical isolate                                                         | (6)               |
| JL638                                      | 1141733 $\Delta$ <i>gpsB</i> ( $\Delta$ Y6-N133)                                                     | This work         |
| <b>PLASMIDS</b>                            |                                                                                                      |                   |
| pJH086                                     | <i>E. faecalis</i> allelic exchange vector (Cm <sup>R</sup> ); <i>pheS</i> * counterselection        | (7)               |
| pJLL254                                    | $\Delta$ <i>gpsB</i> <sub>Efs</sub> deletion allele in pJH086                                        | This work         |
| pJLL261                                    | $\Delta$ <i>gpsB</i> <sub>Efm</sub> deletion allele in pJH086                                        | This work         |
| pJLL272                                    | $\Delta$ <i>mltG</i> <sub>Efs</sub> deletion allele in pJH086                                        | This work         |
| pET28a::his <sub>6</sub> -smt <sub>3</sub> | <i>E. coli</i> protein expression vector (Kn <sup>r</sup> ) with SUMO cleavable his <sub>6</sub> tag | Brian Volkman Lab |
| pET28b                                     | <i>E. coli</i> protein expression vector (Kn <sup>r</sup> )                                          | Novagen           |
| pNEM23                                     | pET28a::his <sub>6</sub> -smt <sub>3</sub> - <i>gpsB</i>                                             | This work         |
| pNEM24                                     | pET28a::his <sub>6</sub> -smt <sub>3</sub> - <i>gpsB</i> 8A                                          | This work         |
| pNEM46                                     | pET28a::his <sub>6</sub> -smt <sub>3</sub> - <i>gpsB</i> $\Delta$ P114-F136                          | This work         |
| pCJK111                                    | pET28b::his <sub>6</sub> - <i>ireK-n</i>                                                             | (4)               |
| pCJK142                                    | pET28b::his <sub>6</sub> - <i>ireK-n</i> K41R                                                        | (4)               |
| pBDL133                                    | pET28b::his <sub>6</sub> -smt <sub>3</sub> - <i>ireP</i>                                             | (8)               |
| pJRG9                                      | <i>E. faecalis</i> expression vector, constitutive P23 <sub>s</sub> promoter (Cm <sup>r</sup> )      | (5)               |
| pNEM4                                      | pJRG9:: <i>gpsB</i> -His <sub>6</sub>                                                                | This work         |
| pNEM6                                      | pJRG9:: <i>gpsB</i> $\Delta$ P114-F136-His <sub>6</sub>                                              | This work         |
| pNEM29                                     | pJRG9:: <i>gpsB</i> 8A-His <sub>6</sub>                                                              | This work         |
| pJLL47                                     | pJRG9:: <i>irePireK</i> -His <sub>6</sub>                                                            | This work         |

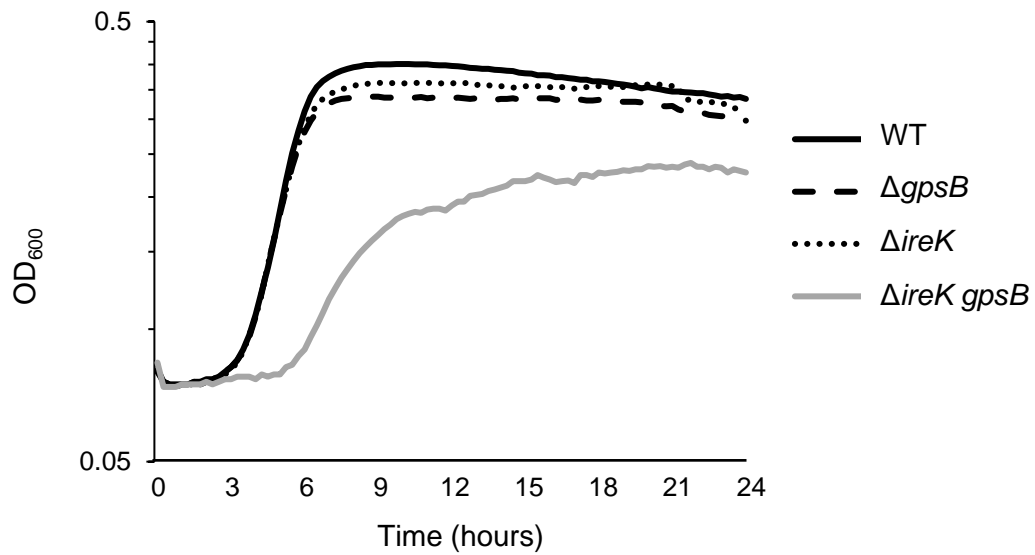

**Figure S1. Growth phenotypes for various strains at 37°C.** Cells were grown in Mueller-Hinton Broth for 24 hours at 37°C. The optical density at 600 nm (OD<sub>600</sub>) was measured every 15 minutes. Data is representative of 3 biological replicates. Strains were wild-type (WT), OG1;  $\Delta gpsB$ , JL635;  $\Delta ireK$ , JL206; and  $\Delta ireK gpsB$ , NM6.

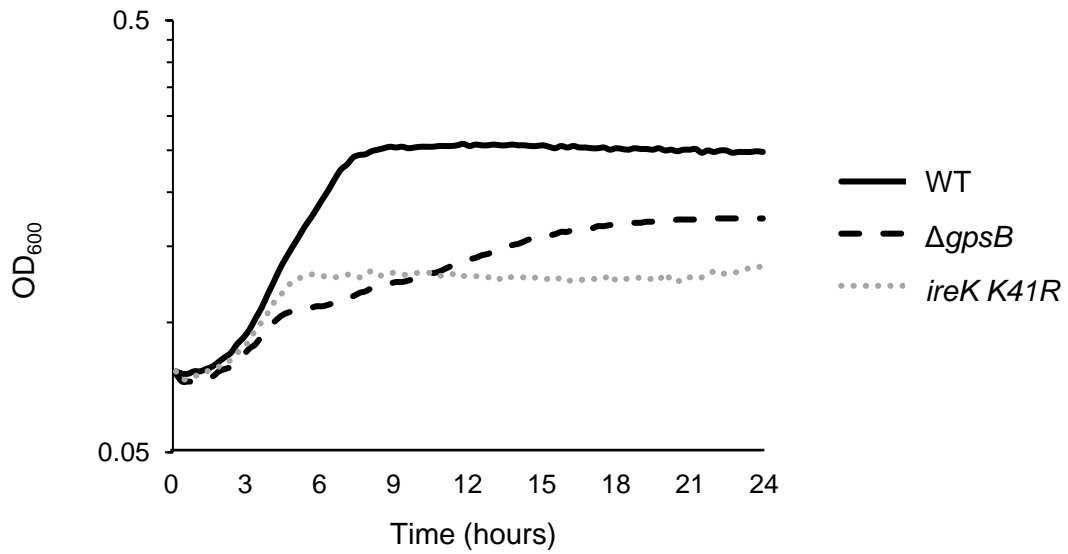

**Figure S2. The  $\Delta gpsB$  mutant exhibits a growth defect at 45°C.** Cells were grown in Mueller-Hinton Broth for 24 hours at 45°C. The optical density at 600 nm (OD<sub>600</sub>) was measured every 15 minutes. Data is representative of 3 biological replicates. Strains were wild-type (WT), OG1;  $\Delta gpsB$ , JL635; and *ireK* K41R, BL102.

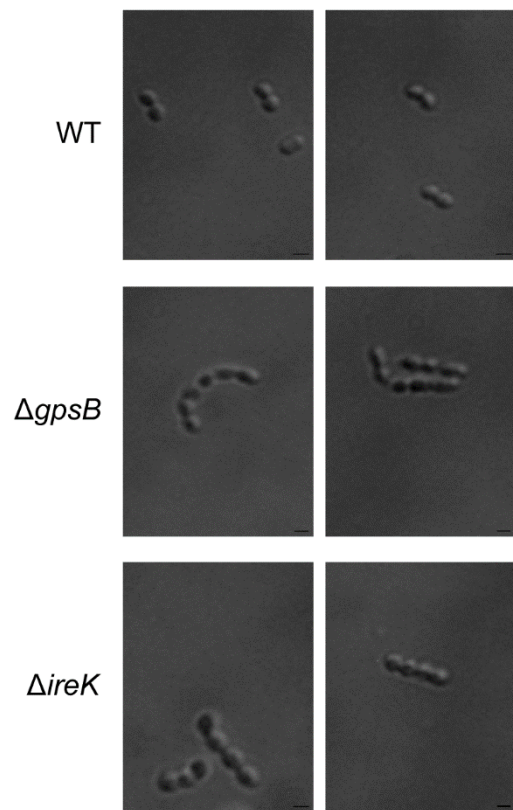

**Figure S3.  $\Delta gpsB$  cell morphology phenocopies  $\Delta ireK$  cell morphology.** Differential interference contrast microscopy was performed on stationary phase cultures grown in Mueller-Hinton Broth at 37°C. Scale bars represent 1  $\mu\text{m}$ . Strains were wild-type, OG1;  $\Delta gpsB$ , JL635; and  $\Delta ireK$ , JL206.

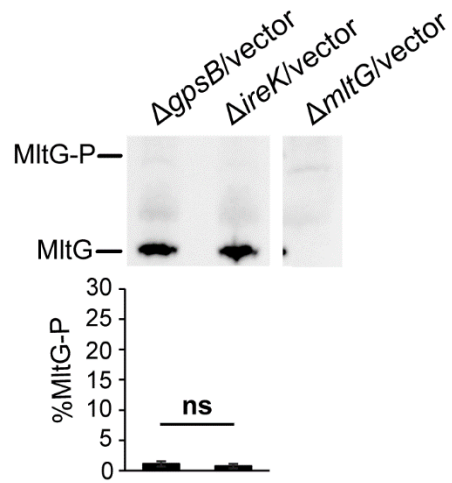

**Figure S4. IreK signaling of the  $\Delta gpsB$  and  $\Delta ireK$  mutants are similar.** Total protein lysates were prepared from exponentially-growing cells, and pairwise comparisons were subjected to Phos-tag SDS-PAGE followed by immunoblot analysis using antiserum to detect MltG. The immunoblot image is representative of at least 3 biological replicates per strain. Bar graph data show the average %MltG phosphorylation (% MltG-P) of the 3 replicates. Error bars represent one standard deviation. ns, not significant; student's T-test (heteroscedastic, two-tailed). Strains were  $\Delta gpsB$ /vector, JL635/pJRG9;  $\Delta ireK$ /vector, JL206/pJRG9; and  $\Delta mltG$ /vector, JL650/pJRG9.

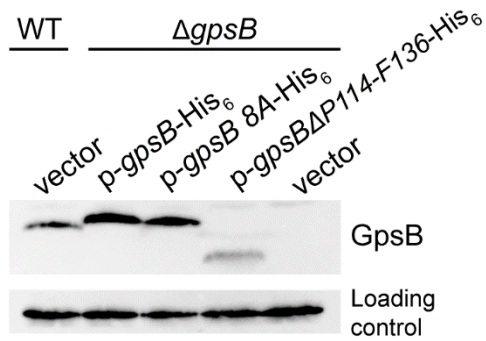

**Figure S5. Immunoblot analysis of ectopically expressed wild-type GpsB and GpsB mutants.** Total protein lysates were prepared from exponentially-growing *E. faecalis* cells harboring the vector or plasmids expressing wild-type or mutant GpsB-His<sub>6</sub>. Immunoblotting was performed using antisera to detect GpsB and RpoA (loading control). Strains were WT/vector, OG1/pJRG9;  $\Delta$ *gpsB*/p-*gpsB*-His<sub>6</sub>, JL635/pNEM4;  $\Delta$ *gpsB*/p-*gpsB* 8A-His<sub>6</sub>, JL635/pNEM29;  $\Delta$ *gpsB*/p-*gpsB* ΔP114-F136-His<sub>6</sub>, JL635/pNEM6; and  $\Delta$ *gpsB*/vector, JL635/pJRG9.



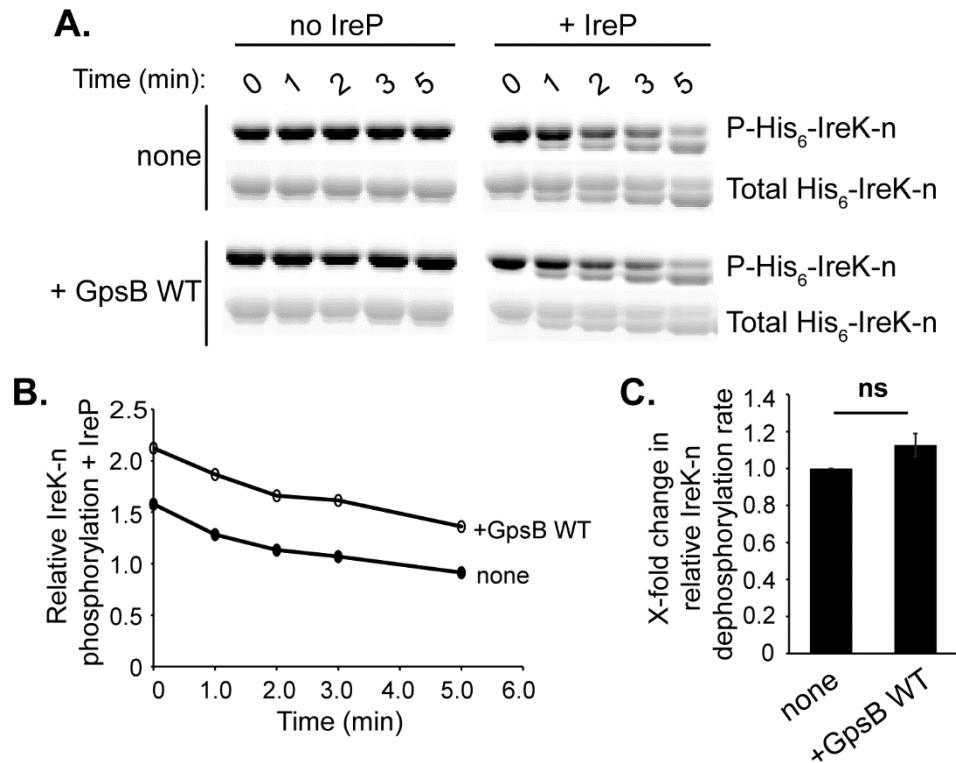

**Figure S6. GpsB does not alter IreP-mediated dephosphorylation of IreK *in vitro*.** *in vitro*

dephosphorylation assays were performed with purified proteins to assess the impact of wild-type GpsB (GpsB WT) on IreK dephosphorylation. Phosphorylated His<sub>6</sub>-IreK-n was incubated at room temperature with 10-fold excess of wild-type GpsB relative to phosphorylated His<sub>6</sub>-IreK-n. Samples were taken at various time intervals after the addition of IreP. **A.** After SDS-PAGE, Pro-Q Diamond phosphoprotein stain was used to visualize phosphorylated His<sub>6</sub>-IreK-n (P-His<sub>6</sub>-IreK-n) and SYPRO Ruby protein gel stain was used to visualize total His<sub>6</sub>-IreK-n. Gel images are representative of two independent experiments. **B.** The phosphorylated His<sub>6</sub>-IreK-n and total His<sub>6</sub>-IreK-n signals from the gels were quantified. Relative His<sub>6</sub>-IreK-n phosphorylation for each timepoint was calculated by determining the ratios of phosphorylated His<sub>6</sub>-IreK-n to total His<sub>6</sub>-IreK-n for each timepoint. The graph is representative of data from 2 independent experiments. **C.** Initial relative His<sub>6</sub>-IreK-n phosphorylation rates were determined by finding the slopes of the best fit lines in graph (B) for each reaction. Shown are the x-fold-changes in rate for the reactions that contain GpsB relative to the reaction without GpsB. Data are the mean x-fold

change from 2 independent experiments. Error bars represent one standard deviation. ns = not significant, student's T-test (heteroscedastic, two-tailed).

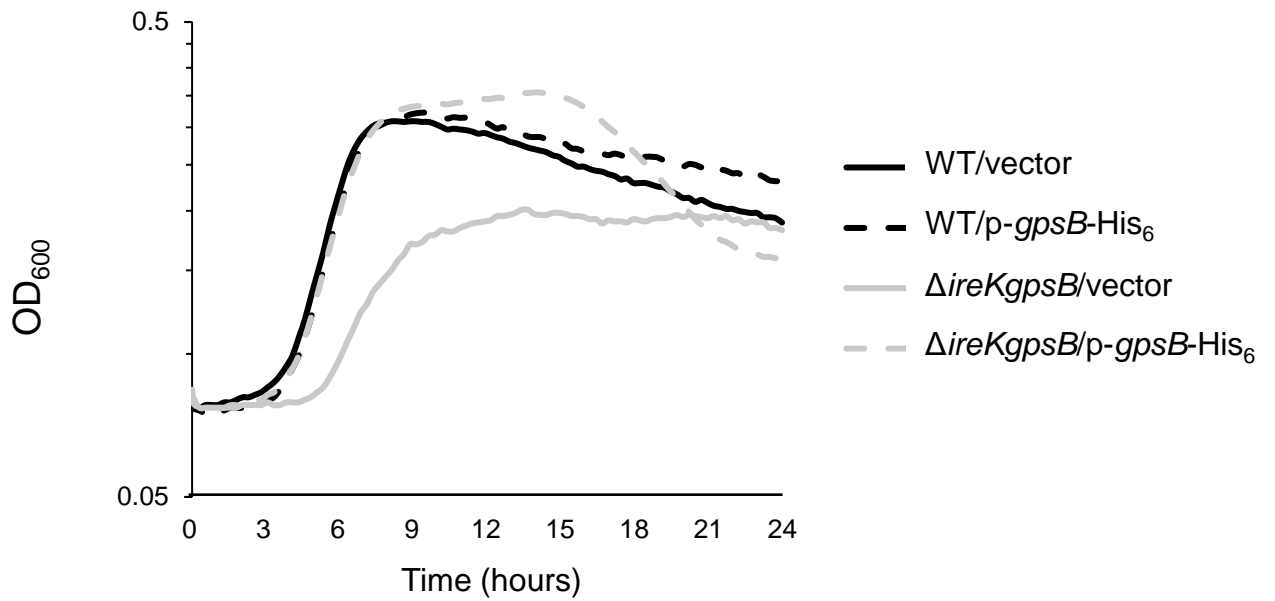

**Figure S7. Ectopic expression of *gpsB* restores normal growth to the  $\Delta$ *ireK* *gpsB* mutant.** Cells were grown in Mueller-Hinton Broth for 24 hours at 37°C. The optical density at 600 nm (OD<sub>600</sub>) was measured every 15 minutes. Data is representative of 3 biological replicates. Strains were wild-type (WT)/vector, OG1/pJRG9; WT/p-*gpsB*-His<sub>6</sub>, OG1/pNEM4;  $\Delta$ *ireK* *gpsB*/vector, NM6/pJRG9; and  $\Delta$ *ireK* *gpsB*/p-*gpsB*-His<sub>6</sub>, NM6/pNEM4.

|                         |                                                                |     |
|-------------------------|----------------------------------------------------------------|-----|
| <i>E. faecalis</i>      | ----MANLVYSPKDILQKEFKTKMMNGYDPIEVDEFLDNVIKDYEAYNKELLSLQEENSR   | 56  |
| <i>E. faecium</i>       | ----MANLVYSPKDILQQEFKTK-MRGYDPVEVDEFLDNIIKDYETYSKELLALQEENDR   | 55  |
| <i>S. pneumoniae</i>    | ----MASIIIFSAKDIFEQEFGRE-VRGYNKVEVDEFLLDDVIKDYETYAALVKSLRQEIAD | 55  |
| <i>B. subtilis</i>      | --MLADKVKLSAKEILEKEFKTG-VRGYKQEDVDFLDMIKDYETFHQEIIEELQQENLQ    | 57  |
| <i>L. monocytogenes</i> | MTSEQFEYHLTGKEILEKEFKTG-LRGYSPEDVDEFLLDMVIKDYSTFTQEIEALQAENIR  | 59  |
|                         | . : *:::* * : . ** . : *::* * : * * * . : : . : * : *          |     |
| <i>E. faecalis</i>      | LMAKLDQLSKAQPTP---RVAQEVPKSAAVTINFDILKRLSNLEREVFGKKLDETPSTPVT  | 113 |
| <i>E. faecium</i>       | LSAKVAQLSKTQGAAQTRVQQTEVPKSAAVTINFDILKRLSNLEREVFGKKLDQASAV-K   | 114 |
| <i>S. pneumoniae</i>    | LKEELTRKPKPSPVQ---AEPLEAAITSSMTNFDILKRLNRLEKEVFGKQILDNSDF---   | 109 |
| <i>B. subtilis</i>      | LKKQLEEASKKQ-----PVQSNITNFDILKRLSNLEKHVFGSKLYD-----            | 98  |
| <i>L. monocytogenes</i> | LVQELDNAPLRTSTQPA-PTFQAAAQAGTTNFDILKRLSNLEKHVFGNKLDDNE-----    | 113 |
|                         | * :: . : ***** . ** . * * . : : :                              |     |
| <i>E. faecalis</i>      | PSAPSM--TAEPANHDVDNAQTRQF                                      | 136 |
| <i>E. faecium</i>       | PAQPNPNNYTNADTSLDDNEKTRQF                                      | 139 |
| <i>S. pneumoniae</i>    | -----                                                          | 109 |
| <i>B. subtilis</i>      | -----                                                          | 98  |
| <i>L. monocytogenes</i> | -----                                                          | 113 |

**Figure S8. Sequence alignment of enterococcal GpsB with homologs from other bacterial species.**

Sequences of GpsB homologs from various bacterial species were compared using Clustal Ω. Highlighted in grey are the putative phosphorylation sites for *E. faecalis* GpsB and the known phosphorylation site for *B. subtilis* GpsB. GpsB homologs represented are from *Enterococcus faecalis* OG1RF (WP\_002357990.1), *Enterococcus faecium* 1,141,733 (WP\_002309359.1), *Streptococcus pneumoniae* D39 (WP\_000146522.1), *Bacillus subtilis* 168 (WP\_003225629), and *Listeria monocytogenes* EDG-e (WP\_003722998.1).

### Supplemental References:

1. Gold OG, Jordan HV, van Houte J. 1975. The prevalence of enterococci in the human mouth and their pathogenicity in animal models. *Arch Oral Biol* 20:473-477.
2. Dunny GM, Brown BL, Clewell DB. 1978. Induced cell aggregation and mating in *Streptococcus faecalis*: evidence for a bacterial sex pheromone. *Proc Natl Acad Sci U S A* 75:3479-3483.
3. Labbe BD, Kristich CJ. 2017. Growth- and stress-induced PASTA kinase phosphorylation in *Enterococcus faecalis*. *J Bacteriol* 199:e00363-17.
4. Kristich CJ, Little JL, Hall CL, Hoff JS. 2011. Reciprocal regulation of cephalosporin resistance in *Enterococcus faecalis*. *MBio* 2:e00199-11.
5. Snyder H, Kellogg SL, Skarda LM, Little JL, Kristich CJ. 2014. Nutritional Control of Antibiotic Resistance via an Interface between the Phosphotransferase System and a Two-Component Signaling System. *Antimicrob Agents Chemother* 58:957-965.
6. Palmer KL, Carniol K, Manson JM, Heiman D, Shea T, Young S, Zeng Q, Gevers D, Feldgarden M, Birren B, Gilmore MS. 2010. High-quality draft genome sequences of 28 *Enterococcus* sp. isolates. *J Bacteriol* 192:2469-2470.
7. Kellogg SL, Little JL, Hoff JS, Kristich CJ. 2017. Requirement of the CroRS two-component system for resistance to cell wall-targeting antimicrobials in *Enterococcus faecium*. *Antimicrob Agents Chemother* 61:e02461-16.
8. Labbe BD, Hall CL, Kellogg SL, Chen Y, Koehn O, Pickrum AM, Mirza SP, Kristich CJ. 2019. Reciprocal regulation of PASTA kinase signaling by differential modification. *J Bacteriol* 201:e00016-19.
